# Supplementary material for: Full-Length Enriched cDNA Libraries and ORFeome Analysis of Sugarcane Hybrid and Ancestor Genotypes
Source: PubMed Central journal article supplement (PMC4164538; doi:10.1371/journal.pone.0107351), 2014-09-15
Supplement: pone.0107351.s001.pdf [file pone.0107351.s001.pdf]

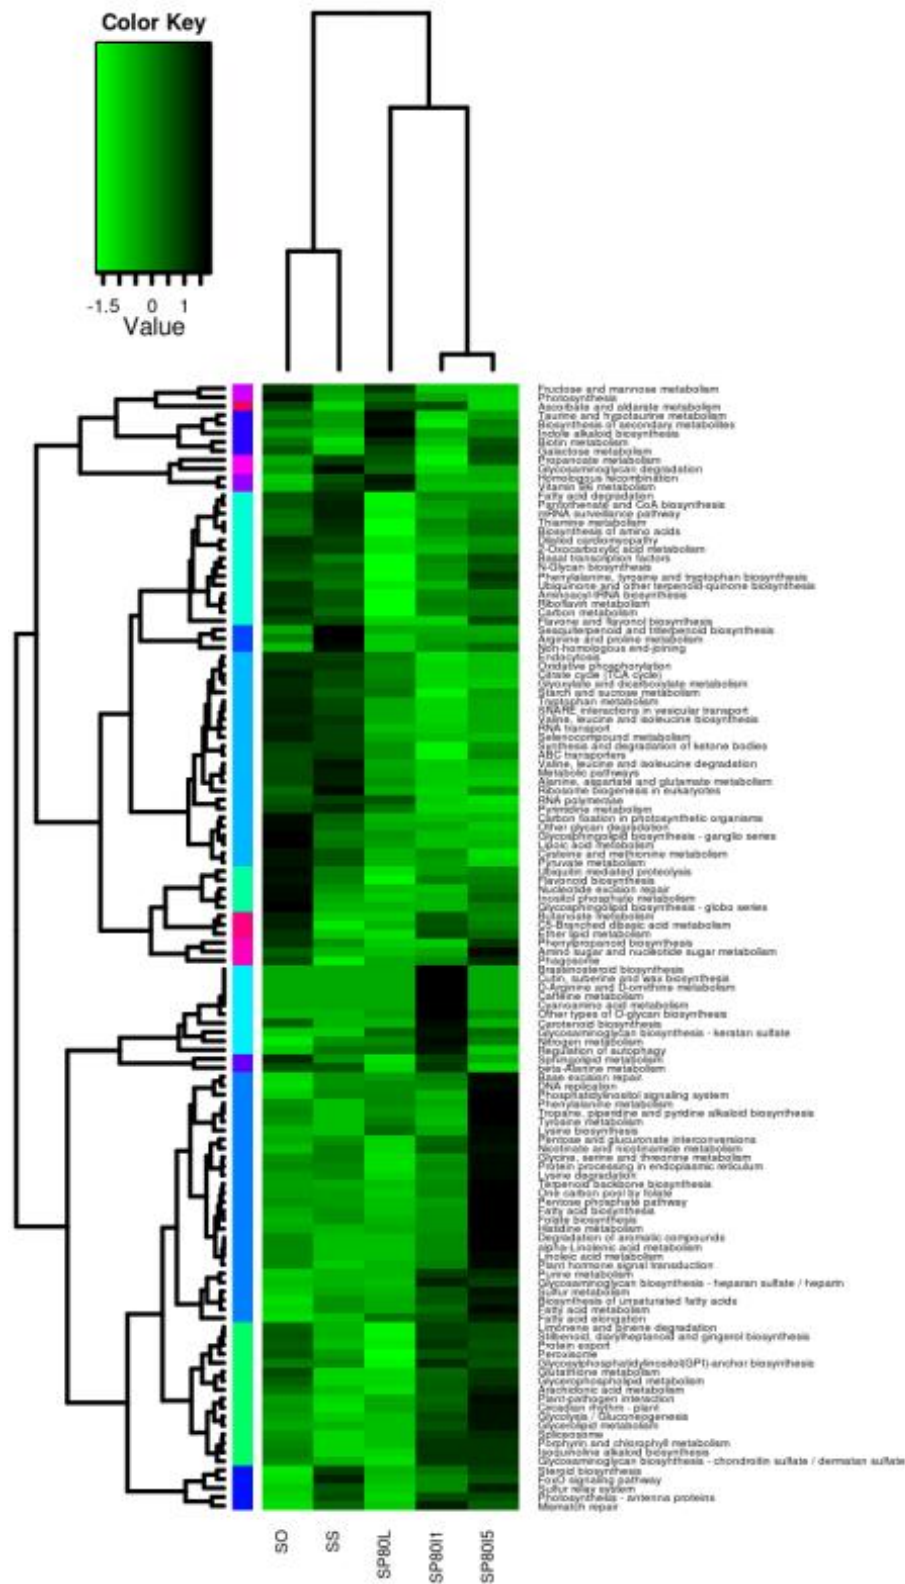

**Figure S1. Heat map of ‘pathway activity’ of natural antisense transcripts based on KEGG pathway annotation. SO, *Saccharum officinarum* (leaf); SS, *Saccharum spontaneum* (leaf); SP80L, SP803280 (Leaf); SP80I1, SP803280 (immature internodes); SP80I5, SP803280 (intermediate internodes).**
